# Supplementary material
Source: MDPI journal article supplement (https://www.mdpi.com/2073-4441/13/23/3380)
Supplement: s1 [file s1]

## Supplementary data

Table S1 macroinvertebrates species identified in Baiyangdian Lake during survey in this study.

| Time                             | 2017.05 | 2017.06 | 2017.07 | 2017.08 | 2017.09 | 2017.10 | 2017.11 | 2018.04 | 2018.06 | 2018.08 | 2018.10 |
|----------------------------------|---------|---------|---------|---------|---------|---------|---------|---------|---------|---------|---------|
| <b><i>Oligochaeta</i></b>        |         |         |         |         |         |         |         |         |         |         |         |
| <i>Limnodrilus hoffmeisteri</i>  | ++      | ++      | -       | ++      | ++      | ++      | ++      | ++      | -       | -       | ++      |
| <i>Branchiura sowerbyi</i>       | ++      | +       | ++      | ++      | ++      | ++      | ++      | +       | ++      | ++      | +       |
| <i>Limnodrilus clapedianus</i>   | -       | ++      | -       | -       | -       | -       | -       | -       | -       | -       | -       |
| <i>Lumbriculus sp.</i>           | -       | +       | -       | -       | -       | -       | -       | -       | -       | -       | -       |
| <b><i>Hirudinea</i></b>          |         |         |         |         |         |         |         |         |         |         |         |
| <i>Erpobdella sp.</i>            | -       | -       | -       | -       | -       | +       | -       | +       | -       | -       | -       |
| <b><i>Gastropoda</i></b>         |         |         |         |         |         |         |         |         |         |         |         |
| <i>Cipangopaludina chinensis</i> | +       | -       | ++      | -       | -       | -       | -       | -       | -       | -       | -       |
| <i>Bithynia fuchsiana</i>        | ++      | ++      | ++      | ++      | ++      | ++      | ++      | +++     | ++++    | ++++    | ++++    |
| <i>Hippeutis cantori</i>         | ++      | -       | -       | -       | -       | -       | -       | -       | -       | -       | -       |
| <i>Radix tagotis</i>             | +       | -       | -       | -       | -       | -       | -       | -       | -       | -       | -       |
| <i>Bellamyia purificata</i>      | -       | -       | ++      | ++      | +       | +       | ++      | +       | ++++    | -       | +       |
| <i>Alocinma longicornis</i>      | -       | -       | -       | ++++    | -       | ++      | +       | -       | -       | -       | -       |
| <i>Bellamyia aeruginosa</i>      | -       | -       | -       | +++     | ++      | ++      | ++      | ++      | +++     | ++      | +       |
| <i>Galba perversa</i>            | -       | -       | -       | ++      | -       | -       | -       | -       | -       | -       | -       |
| <i>Gyraulus convexiusculus</i>   | -       | -       | -       | -       | +       | -       | -       | -       | -       | -       | -       |
| <i>Bithynia misella</i>          | -       | -       | -       | -       | -       | -       | ++      | ++      | ++      | ++      | ++      |
| <i>Radix plicatula</i>           | -       | -       | -       | -       | -       | -       | +       | -       | -       | -       | -       |
| <b><i>Isecta</i></b>             |         |         |         |         |         |         |         |         |         |         |         |
| <i>Cldopelma edwardsi</i>        | ++      | -       | -       | -       | -       | -       | +++     | -       | -       | -       | -       |
| <i>Chironomus plumosus</i>       | ++++    | -       | -       | ++      | +++     | ++      | -       | +++     | ++      | -       | ++      |



|                                 |     |      |      |     |      |      |      |      |      |     |      |
|---------------------------------|-----|------|------|-----|------|------|------|------|------|-----|------|
| <i>Prosilocerus kamusi</i>      | +++ | ++++ | ++   | +++ | ++   | ++++ | ++++ | ++++ | ++++ | +++ | ++++ |
| <i>Chironomus acerbiphilus</i>  | -   | ++++ | ++++ | -   | -    | -    | -    | -    | -    | -   | -    |
| <i>Tanypus punctipennis</i>     | -   | ++   | +++  | -   | -    | -    | -    | -    | -    | -   | -    |
| <i>Tanypus villipennis</i>      | -   | -    | -    | +++ | ++++ | ++++ | +++  | +    | -    | -   | ++   |
| <i>Procladius choreus</i>       | -   | ++   | -    | -   | -    | -    | -    | -    | -    | -   | -    |
| <i>Krenosmittia camptopheps</i> | -   | +    | -    | -   | -    | -    | -    | -    | -    | -   | -    |
| <i>Chaoborus sp.</i>            | -   | -    | ++   | -   | -    | -    | -    | -    | -    | -   | +    |
| <i>Einfeldia sp.</i>            | -   | -    | -    | -   | -    | +    | +    | +    | ++   | -   | +++  |
| <i>Microchironomus tener</i>    | -   | -    | -    | -   | ++   | -    | -    | -    | -    | -   | -    |
| <i>Tanypus villipennis</i>      | -   | -    | -    | -   | -    | -    | +    | -    | -    | -   | -    |
| <i>Polypedilum sp.</i>          | -   | -    | -    | -   | -    | -    | -    | -    | -    | -   | +    |
| <b>Crustacea</b>                |     |      |      |     |      |      |      |      |      |     |      |
| <i>Macrobrachium nipponense</i> | -   | -    | -    | -   | +    | -    | -    | -    | -    | -   | -    |
| <i>Caridina sp.</i>             | -   | -    | -    | -   | -    | -    | +    | -    | -    | -   | -    |
| <i>Anisogammarus sp.</i>        | -   | -    | -    | -   | -    | -    | +    | -    | -    | -   | -    |
| <b>Bivalvia</b>                 |     |      |      |     |      |      |      |      |      |     |      |
| <i>Anodonta angula</i>          | -   | -    | -    | ++  | -    | -    | -    | -    | -    | -   | -    |

Note: “+” represents the individual amounts less than 1% in the total quantity; “++” represents the individual amounts more than 1% and less than 10% in the total quantity; “+++” represents the individual amounts more than 10% and less than 20% in the total quantity; “++++” represents the individual amounts more than 20% in the total quantity; “-” represents no species under this sampling event. Species with a yellow background do not participate in the analysis of community dissimilarity.
